# Supplementary material for: YAP regulates porcine skin-derived stem cells self-renewal partly by repressing Wnt/β-catenin signaling pathway
Source: Research Square preprint supplement (doi:10.21203/rs.3.rs-414853/v1), 2021-04-14
Supplement: Supplementary file 1 [file 3958967bb7cf775c1d57c51a.docx]

**Table S1:** Antibodies used in this paper

| **Primary antibodies** | **Vendor** | **Dilution** | Source |
| --- | --- | --- | --- |
| Sox2(Flow Cyt/WB) | Sangon (D121248) | 1:200/1:200 | Rabbit |
| Oct4(Flow Cyt/WB) | Abcam(ab18976) | 1:200/1:200 | Rabbit |
| Vasa(Flow Cyt/WB) | Abcam (ab13840) | 1:200/1:1000 | Rabbit |
| Gapdh(WB) | ImmunoWay( YM3040) | 1:1000 | Mouse |
| SSEA1(Flow Cyt) | Millipore (MAB4301) | 1:200 | Rabbit |
| IVL (IF/Flow Cyt) | kleanAB( 18661487273) | 1:200/1:200 | Rabbit |
| YAP1 (IF/WB/Flow Cyt) | Nvogene(NHA13578) | 1:200/1:1000/1:200 | Rabbit |
| β-catenin(WB) | KleanAB(P110436 | 1:200/1:200 | Rabbit |
| **Secondary antibodies**  CY3-conjugated goat anti-mouse(IF)  CY3-conjugated goat anti-rabbit(IF)  FITC-conjugated goat anti-rabbit(IF)  FITC-conjugated goat anti-mouse(IF)  HRP-conjugated goat anti- rabbit IgG(WB) | Beyotime (A0521)  Beyotime (A0516)  Beyotime (A0562)  Beyotime (A0568)  Beyotime (A0258) | 1:150  1:150  1:150  1:150  1:1000 | Goat  Goat  Goat  Goat  Goat |
